# Supplementary material for: Supramolecular architectures based on transition metal complexes with 1-(3-pyridyl)-2-(4′-pyrimidyl)ethene
Source: Royal Society of Chemistry journal article supplement (doi:10.1039/b802044b), 2008-01-01
Supplement: b802044b.pdf [file b802044b.pdf]

## Electronic Supplementary Information

### Supramolecular architectures based on transition metal complexes with 1-(3-pyridyl)-2-(4'-pyrimidyl)ethene

Na Liu,<sup>a</sup> Yan-Qin Wang,<sup>a</sup> En-Qing Gao,<sup>\*a</sup> Zhen-Xia Chen,<sup>b</sup> and Lin-Hong Weng<sup>b</sup>

#### 1. Topologic analysis of the 3D structure of **2**.

Four independent sets of nodes can be identified in the 3D structure of **2**: the metal coordination sphere, the two independent organic ligands, and the lattice water molecule. The metal coordination sphere can be regarded as a 7-connecting node: each is connected to five organic molecules (through two M-N coordination bonds and three O-H...N hydrogen bonds) and two lattice water molecules (through O-H...O5 hydrogen bonds). The two independent organic ligands can both be regarded as 3-connecting nodes: one is connected to three metal ions through M-N and O-H...N bonds, and the other is connected to two metal nodes (through M-N and an O-H...N bonds) and a lattice water molecule (through O-H...N). The lattice water molecule (O5) is also a 3-connecting node: each is connected to two metal nodes through O-H(coordinated water)... O5, and it is also hydrogen bonded to an organic node through O-H...N. Therefore, the 3D structure exhibits an unusual type of tetranodal 3,7-connecting net topology (Fig. S1, omitting the purple links between the metal nodes), which has a long Schläfli symbol:  $(4^3)(4^1 6^2)(6^2 8)(4^4 6^7 8^{10})$ .

The perchlorate ion has been omitted for simplicity in the above analysis. If the perchlorate ion hydrogen-bonded to two coordinated water molecules from different metal ions is considered as a linker between the metal nodes, the 3D structure can be regarded as a 3,9-connecting net (Fig. S1). The Schläfli symbol can be derived as  $(4^3)(4^1 6^2)(3^1 6^2)(3^2 4^4 6^7 8^{23})$ .

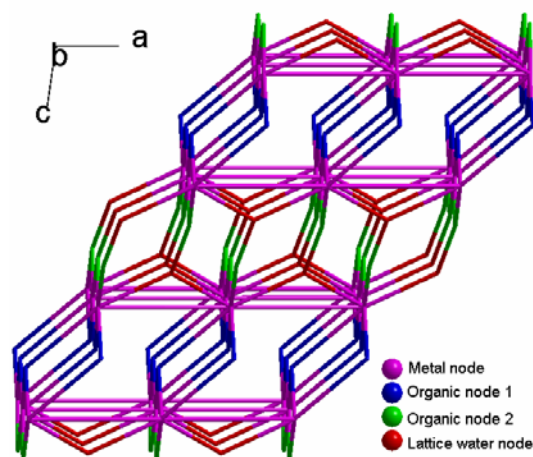

Fig. S1. The 3,9-connecting 3D net in **2**, with four different nodes.

## 2. Tabulated structural parameters for compounds 1-7.

Table S1. Selected bond lengths (Å) and angles (°) for Compounds **1** and **6**.

| Compound  | <b>1</b> (M = Cd) | <b>6</b> (M = Cu) |
|-----------|-------------------|-------------------|
| M1-O1     | 2.346(2)          | 2.358(4)          |
| M1-O2     | 2.307(2)          | 2.001(4)          |
| M1-N1     | 2.2843(18)        | 2.020(4)          |
| O1-M1-O2  | 90.17(9)          | 90.21(16)         |
| O1-M1-N1  | 88.15(8)          | 90.56(16)         |
| O1-M1-O2a | 89.83(9)          | 89.79(16)         |
| O1-M1-N1a | 91.85(8)          | 89.44(16)         |
| O2-M1-N1  | 87.46(7)          | 91.44(16)         |
| O2-M1-N1a | 92.54(7)          | 88.56(16)         |
| O1-M1-O1a | 180.0             | 180.0             |
| O2-M1-O2a | 180.0             | 180.0             |
| N1-M1-N1a | 180.0             | 180.0             |

Symmetry codes: a = -x+1,-y+2,-z for **1**, and -x,-y+1,-z for **6**.

Table S2. Selected bond lengths (Å) and angles (°) for Compounds **2-5**.

| Compound | <b>2</b> (M = Mn) | <b>3</b> (M = Co) | <b>4</b> (M = Ni) | <b>5</b> (M = Zn) |
|----------|-------------------|-------------------|-------------------|-------------------|
| M1-O1    | 2.177(6)          | 2.108(4)          | 2.076(5)          | 2.127(3)          |
| M1-O2    | 2.178(5)          | 2.096(4)          | 2.060(5)          | 2.108(3)          |
| M1-O3    | 2.193(6)          | 2.104(5)          | 2.088(5)          | 2.145(3)          |
| M1-O4    | 2.180(6)          | 2.090(4)          | 2.075(5)          | 2.114(3)          |
| M1-N1    | 2.261(6)          | 2.132(5)          | 2.086(5)          | 2.131(3)          |
| M1-N4    | 2.275(6)          | 2.137(5)          | 2.100(5)          | 2.139(3)          |
| O1-M1-O2 | 176.0(3)          | 178.43(18)        | 178.1(2)          | 178.07(12)        |
| O1-M1-O3 | 94.4(3)           | 91.6(2)           | 90.0(2)           | 91.21(16)         |
| O1-M1-O4 | 89.2(3)           | 90.8(2)           | 92.4(2)           | 91.07(16)         |
| O1-M1-N1 | 87.9(2)           | 88.45(18)         | 87.5(2)           | 87.66(14)         |
| O1-M1-N4 | 90.1(2)           | 89.52(18)         | 90.3(2)           | 89.84(14)         |
| O2-M1-O3 | 89.2(2)           | 89.21(17)         | 89.5(2)           | 89.42(14)         |
| O2-M1-O4 | 87.3(2)           | 88.42(17)         | 88.2(2)           | 88.32(14)         |
| O2-M1-N1 | 90.4(2)           | 90.21(17)         | 90.7(2)           | 90.54(13)         |
| O2-M1-N4 | 91.8(2)           | 91.85(17)         | 91.5(2)           | 91.99(13)         |
| O3-M1-O4 | 176.5(2)          | 177.59(17)        | 177.5(2)          | 177.67(13)        |
| O3-M1-N1 | 87.8(2)           | 88.01(18)         | 87.8(2)           | 87.54(13)         |
| O3-M1-N4 | 88.7(2)           | 89.73(18)         | 90.7(2)           | 89.74(13)         |
| O4-M1-N1 | 92.7(2)           | 92.46(18)         | 93.1(2)           | 93.03(13)         |
| O4-M1-N4 | 91.0(2)           | 89.88(18)         | 88.5(2)           | 89.79(13)         |
| N1-M1-N4 | 175.8(2)          | 176.92(19)        | 177.3(2)          | 176.27(13)        |

Table S3. Selected bond lengths (Å) and angles (°) for Compound **7**.

|            |            |            |            |
|------------|------------|------------|------------|
| Cu1-O1     | 2.0099(17) | Cu2-O4     | 1.944(3)   |
| Cu1-N1     | 2.026(2)   | Cu2-O5     | 1.949(3)   |
| Cu1-O2     | 2.2953(19) | Cu2-N2     | 2.0874(19) |
|            |            | Cu2-O3     | 2.2946(19) |
| O1-Cu1-O1a | 180.00(8)  | O3-Cu2-O3b | 177.74(11) |
| O1-Cu1-O2  | 91.35(8)   | O3-Cu2-O4  | 91.13(5)   |
| O1-Cu1-O2a | 88.65(8)   | O3-Cu2-O5  | 88.87(5)   |
| O1-Cu1-N1  | 88.36(8)   | O3-Cu2-N2  | 91.50(7)   |
| O1-Cu1-N1a | 91.64(8)   | O3-Cu2-N2b | 88.49(7)   |
| N1-Cu1-N1a | 180.0      | N2-Cu2-N2b | 179.62(12) |
| N1-Cu1-O2  | 87.37(8)   | N2-Cu2-O4  | 90.19(6)   |
| N1-Cu1-O2a | 92.63(8)   | N2-Cu2-O5  | 89.81(6)   |
| O2-Cu1-O2a | 180.0      | O4-Cu2-O5  | 180.0      |

Symmetry codes: a = -x+1,-y+1,-z+1, b = -x,y,-z+1/2.

Table S4. Hydrogen bond lengths (Å) and angles (°) for Compound **3-5**.

| D        | A [transformation] | d(D-H)  | d(H...A) | d(D...A)  | <(DHA) |
|----------|--------------------|---------|----------|-----------|--------|
| <b>3</b> |                    |         |          |           |        |
| O1       | O5                 | 0.85(3) | 1.84(3)  | 2.673(6)  | 167(7) |
| O1       | O13                | 0.82(3) | 2.41(7)  | 2.926(7)  | 122(7) |
| O2       | O5 [x-1,y,z]       | 0.85(3) | 1.90(3)  | 2.739(7)  | 167(6) |
| O2       | N3 [-x,-y+1,-z+1]  | 0.82(3) | 2.06(3)  | 2.860(6)  | 162(6) |
| O3       | N2 [x,y+1,z]       | 0.82(3) | 2.01(3)  | 2.797(6)  | 161(6) |
| O3       | O7                 | 0.85(3) | 2.04(4)  | 2.843(7)  | 157(5) |
| O4       | N5 [x,y-1,z]       | 0.84(3) | 1.95(3)  | 2.773(6)  | 166(5) |
| O4       | O10 [x-1,y,z]      | 0.83(3) | 1.99(4)  | 2.760(6)  | 154(6) |
| O5       | O8                 | 0.81(3) | 2.00(3)  | 2.782(7)  | 162(7) |
| O5       | N6 [-x+1,-y+2,-z]  | 0.83(3) | 1.93(3)  | 2.753(6)  | 172(7) |
| <b>4</b> |                    |         |          |           |        |
| O1       | O5                 | 0.86(3) | 1.86(4)  | 2.689(7)  | 164(8) |
| O1       | O13                | 0.82(3) | 2.16(5)  | 2.906(10) | 152(9) |
| O2       | O5 [x-1,y,z]       | 0.85(3) | 1.91(3)  | 2.748(7)  | 170(7) |
| O2       | N3 [-x,-y+1,-z+1]  | 0.83(3) | 2.05(3)  | 2.860(7)  | 169(7) |
| O3       | N2 [x,y+1,z]       | 0.81(3) | 2.00(3)  | 2.803(7)  | 169(7) |
| O3       | O7                 | 0.82(3) | 2.19(6)  | 2.834(9)  | 135(7) |
| O4       | N5 [x,y-1,z]       | 0.85(3) | 2.00(4)  | 2.791(7)  | 155(7) |
| O4       | O10 [x-1,y,z]      | 0.84(3) | 1.96(4)  | 2.781(8)  | 165(8) |
| O5       | O8                 | 0.85(3) | 1.99(4)  | 2.798(9)  | 159(8) |
| O5       | N6 [-x+1,-y+2,-z]  | 0.83(3) | 1.94(3)  | 2.763(7)  | 171(8) |
| <b>5</b> |                    |         |          |           |        |

|    |                   |         |         |          |        |
|----|-------------------|---------|---------|----------|--------|
| O1 | O5                | 0.84(3) | 1.84(3) | 2.680(5) | 175(8) |
| O1 | O13               | 0.82(3) | 2.09(3) | 2.898(7) | 166(8) |
| O2 | O5 [x-1,y,z]      | 0.83(3) | 1.92(3) | 2.737(5) | 167(6) |
| O2 | N3 [-x,-y+1,-z+1] | 0.83(3) | 2.05(3) | 2.852(5) | 162(6) |
| O3 | N2 [x,y+1,z]      | 0.81(3) | 2.05(4) | 2.809(5) | 157(6) |
| O3 | O7                | 0.85(3) | 2.09(4) | 2.835(6) | 145(5) |
| O4 | N5 [x,y-1,z]      | 0.86(3) | 1.96(3) | 2.786(5) | 162(6) |
| O4 | O10 [x-1,y,z]     | 0.83(3) | 2.04(4) | 2.788(6) | 151(6) |
| O5 | O8                | 0.82(3) | 2.03(4) | 2.814(6) | 159(6) |
| O5 | N6 [-x+1,-y+2,-z] | 0.83(3) | 1.94(3) | 2.759(5) | 170(6) |

---

D = donor, A = acceptor.
